# Supplementary material for: [Retracted] A New Survival Model Based on Cholesterol Biosynthesis‐Related Genes for Prognostic Prediction in Clear Cell Renal Cell Carcinoma
Source: Hindawi journal article supplement (doi:10.1155/2021/9972968), 2021-01-01
Supplement: f1 [file 9972968.f1.pdf]

## Supplementary Materials

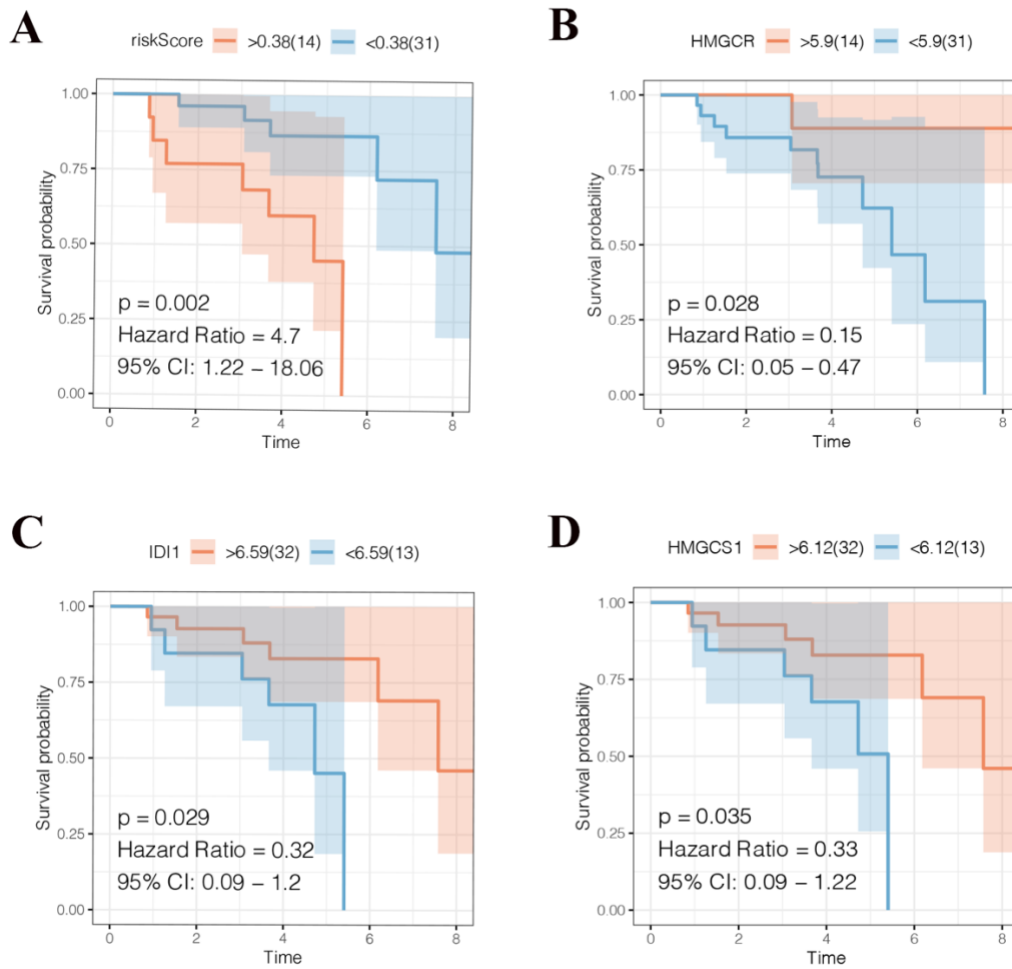

Figure S1: Random sampling validation. (A) Based on this risk model, 45 patients with ccRCC randomly sampled from TCGA database were divided into high- and low-risk groups, and the corresponding survival curves were drawn. (B-D) Based on the expression of key genes of HMGCRC, IDI1 and HMGC1, the corresponding survival curves were drawn in ccRCC.
